# Supplementary material
Source: PubMed Central journal article supplement (PMC8726744)
Supplement: NIHMS1740494-supplement-1.pdf [file NIHMS1740494-supplement-1.pdf]

Supplementary data

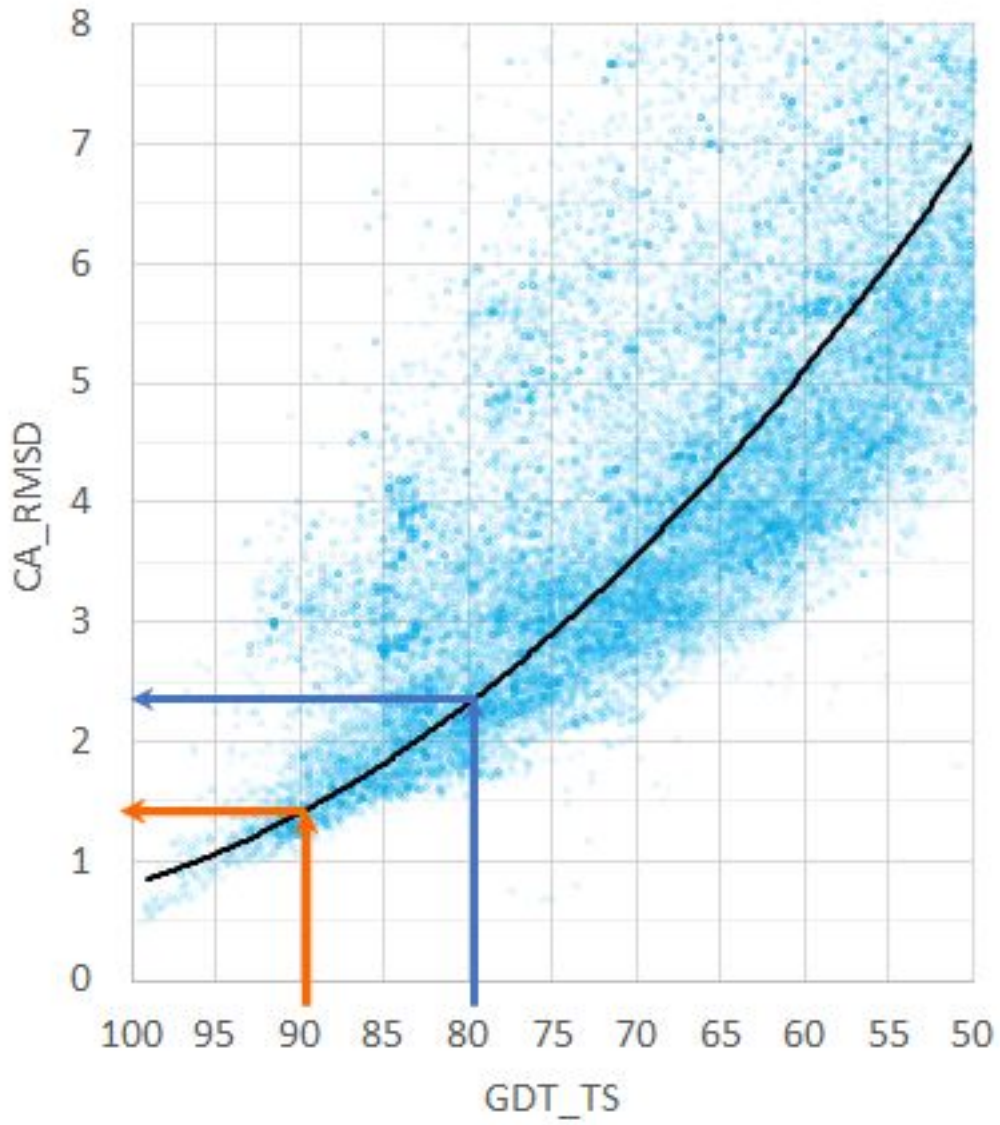

Figure S1: Relationship between C $\alpha$  RMSD and GDT\_TS for higher accuracy CASP14 models.
